# Supplementary material for: Bifunctional polypyridyl-Ru(ii) complex grafted onto gadolinium-based nanoparticles for MR-imaging and photodynamic therapy
Source: Royal Society of Chemistry journal article supplement (doi:10.1039/c3dt50946j), 2013-01-01
Supplement: c3dt50946j.pdf [file c3dt50946j.pdf]

## Electronic Supplementary Informations

### Bifunctional polypyridyl-Ru(II) complex grafted onto gadolinium-based nanoparticles for MR-imaging and photodynamic therapy.

Charles Truillet, Francois Lux, Juliette Moreau, Mickael Four, Lucie Sancey, Sylviane Chevreux, Gaëlle Boeuf, Pascal Perriat, Celine Frochot, Rodolphe Antoine, Philippe Dugourd, Christophe Portefaix, Christine Hoeffel, Muriel Barberi-Heyob, Christine Terryn, Laurence van Gulick, Gilles Lemerrier and Olivier Tillement.

#### Table of Contents

- **Table S1 :** Chemical composition of the **GBN-[Ru]** nanoparticles
- **Figure S1:** Epsilon value determination for the  $[\text{Ru}(\text{Phen})_2(\text{PhenCOOH})]^{2+}, 2\text{PF}_6^-$  complex.
- **Figure S2:** Retention spectra of ruthenium complexes by HPLC followed up by emission (black curve)
- **Figure S3** Irradiation of non-treated cells
- **Figure S4.** Fluorescence cell imaging
- **Figure S5** Plot of  $1/T_1$ , (left) and  $1/T_2$  (right) over Gd concentration of **GBN-[Ru]** nanoparticles. The slope indicates the specific relaxivities ( $r_1$ , and  $r_2$ , respectively).

**Table S1.** Chemical composition of the nanoparticles

| Element                  | Gd    | Ru     | Si    | N    | C     |
|--------------------------|-------|--------|-------|------|-------|
| Measured quantity (mol)  | 1     | 0.0083 | 4     | 5.6  | 24.8  |
| Measured quantity (wt %) | 13.26 | 0.071  | 11.18 | 6.67 | 25.06 |

**Figure S1:** Epsilon value determination for the  $[\text{Ru}(\text{Phen})_2(\text{PhenCOOH})]^{2+}, 2\text{PF}_6^-$  complex.

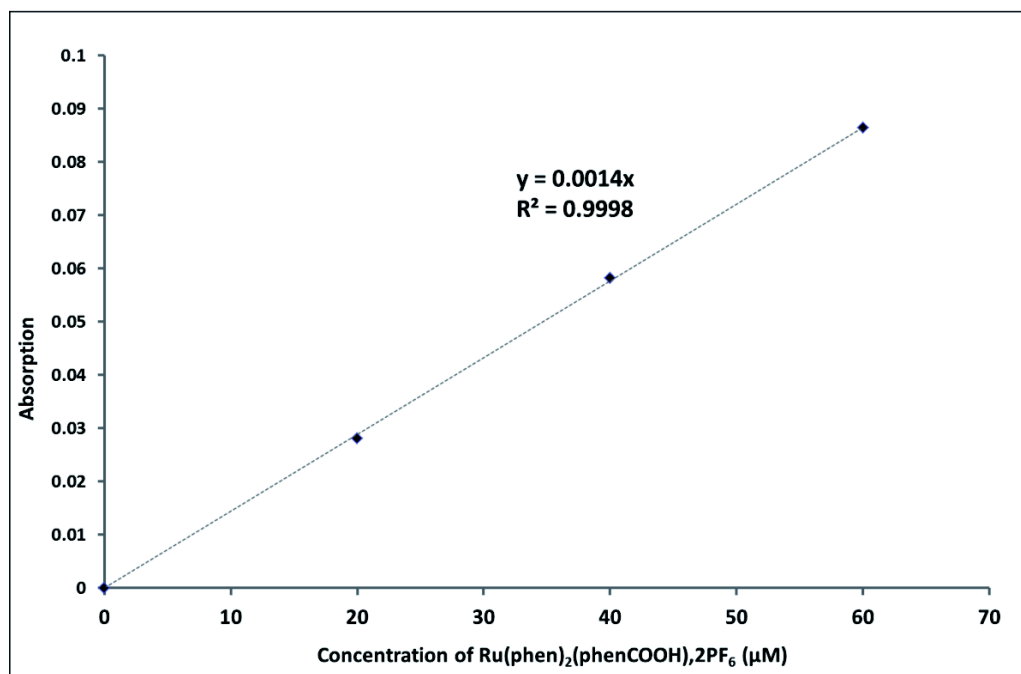

**Figure S2:** Retention spectra of ruthenium complexes by HPLC followed up by emission (black curve).

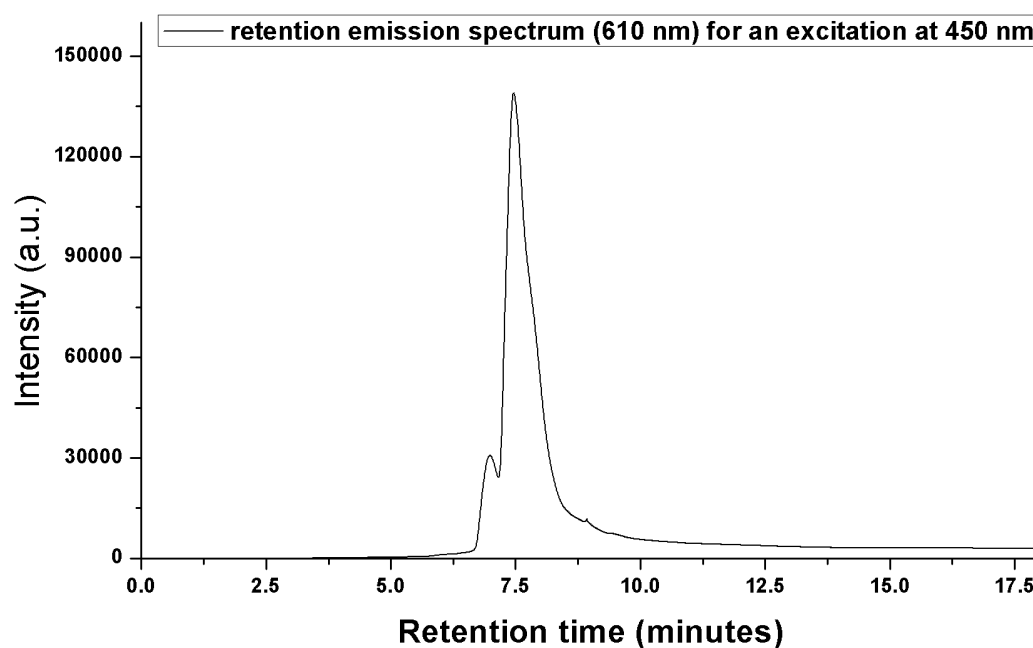

**Figure S3** Irradiation of non-treated cells

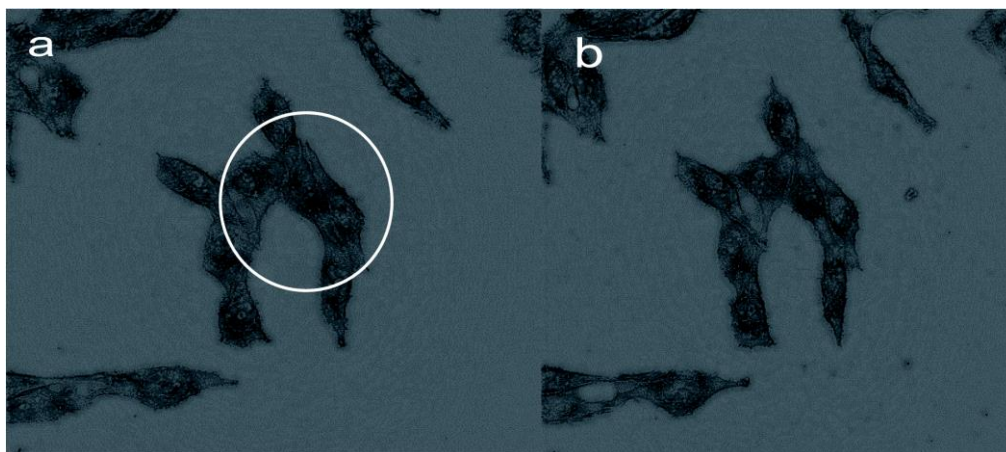

Before (a), and after 10 min (b) irradiation and 45 min waiting

**Fig. S4.** Fluorescence cell imaging

Fluorescence imaging revealed no penetration to the nucleus; the ruthenium complex luminescence was detected in the cells cytoplasm.

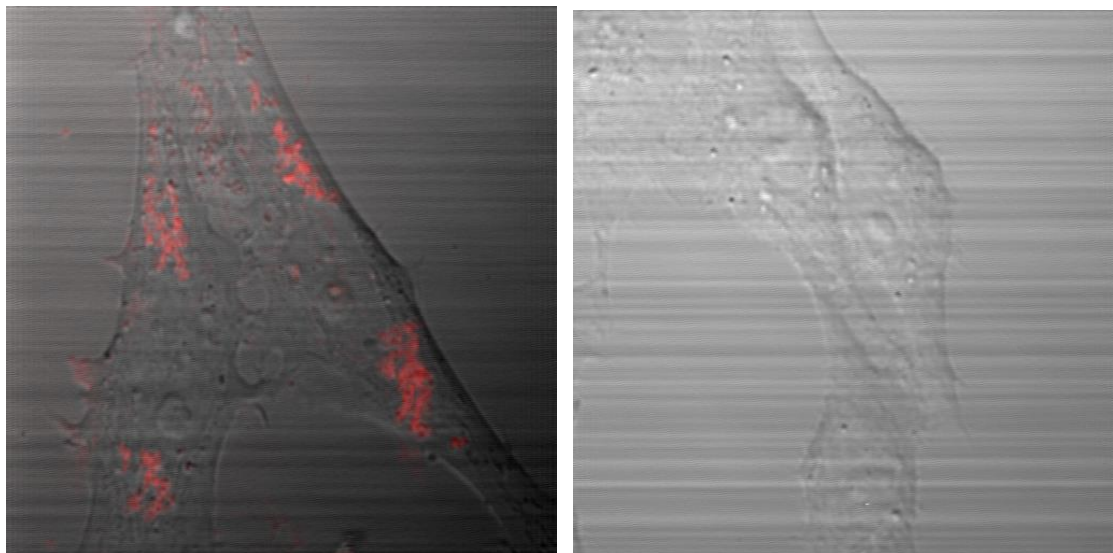

**Figure S5** 1 Plot of  $1/T_1$ , (up) and  $1/T_2$  (down) over Gd concentration of the **GBN-[Ru]** nanoparticles. The slope indicates the specific relaxivities ( $r_1$ , and  $r_2$ , respectively).

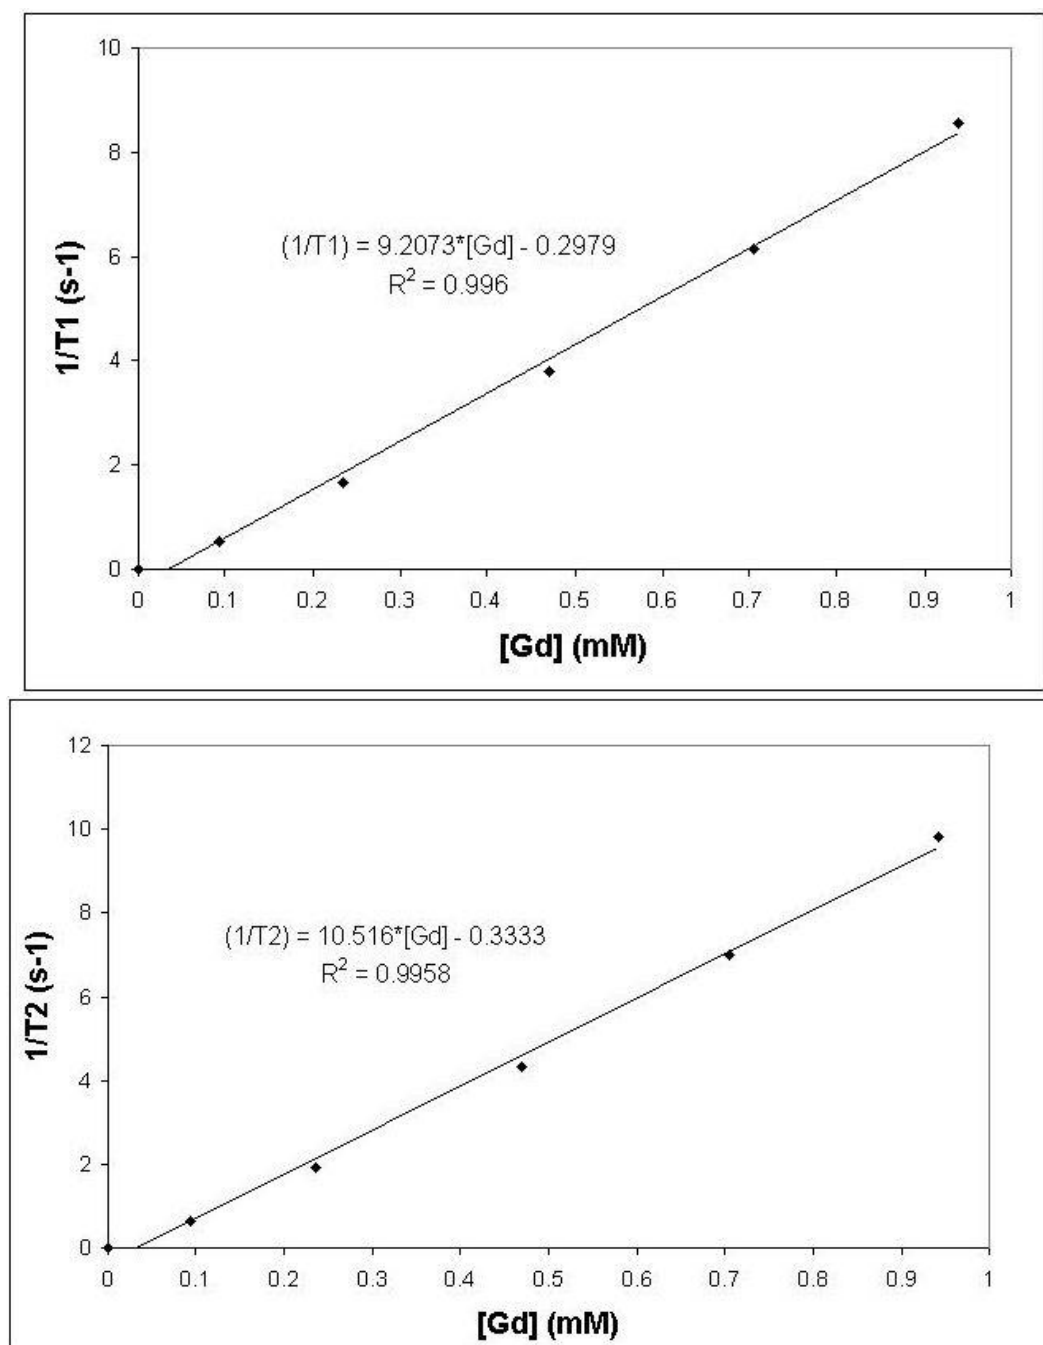

## References

- (1) S. De Feyter, M. M. S. Abdel-Mottaleb, N. Schuurmans, B. J. V. Verkuijl, J. H. van Esch, B. L. Feringa and F. C. De Schryver, *Chem.-Eur. J.* 2004, **10**, 1124.
